# Supplementary material for: Etxahun olerkari erromantikoa
Source: Royal Society of Chemistry journal article supplement (doi:10.1039/c6np00019c), 2012-01-01
Supplement: c6np00019c1.pdf [file c6np00019c1.pdf]

## Electronic Supplementary Information

### Metabolic engineering with systems biology tools to optimize production of prokaryotic secondary metabolites

Hyun Uk Kim,<sup>\*ab</sup> Pep Charusanti,<sup>b</sup> Sang Yup Lee<sup>ab</sup> and Tilmann Weber<sup>\*b</sup>

<sup>a</sup>BioInformatics Research Center, Korea Advanced Institute of Science and Technology (KAIST), Daejeon, Republic of Korea. E-mail: [ehukim@kaist.ac.kr](mailto:ehukim@kaist.ac.kr)

<sup>b</sup>The Novo Nordisk Foundation Center for Biosustainability, Technical University of Denmark, Hørsholm, Denmark. E-mail: [tiwe@biosustain.dtu.dk](mailto:tiwe@biosustain.dtu.dk)

**Table S1** Recent studies aimed at optimizing the production of secondary metabolites since 2012.

| Secondary metabolite   | Application                                          | Production host                                                                      | Approach                                                                                                                                                                                                                                                                             | Production improvement                                                                           | Refs |
|------------------------|------------------------------------------------------|--------------------------------------------------------------------------------------|--------------------------------------------------------------------------------------------------------------------------------------------------------------------------------------------------------------------------------------------------------------------------------------|--------------------------------------------------------------------------------------------------|------|
| 36-Methyl-FK506        | Improving neurite outgrowth activity                 | <i>Streptomyces</i> sp. KCTC 11604BP $\Delta tcbB$ mutant strain (heterologous host) | Heterologous expression of isobutyrylmalonyl-CoA pathway from <i>Streptomyces</i> sp. CNH189                                                                                                                                                                                         | 2-fold increase in titer, compared to the native host                                            | 1    |
| 5-Oxomilbemycins A3/A4 | A precursor of an antiparasitic milbemycin oxime     | <i>Streptomyces bingchenggensis</i>                                                  | Atmospheric and room temperature plasma (ARTP) mutation system, followed by knocking out a gene responsible for ketonization of 5-oxomilbemycins                                                                                                                                     | Approximately 2-fold increase in titer, compared to the initial strain overproducing milbemycins | 2    |
| 6-Deoxyerythronolide B | Macrolide core of an antibiotic erythromycin         | <i>Bacillus subtilis</i> (heterologous host)                                         | Optimized heterologous expression of 6-deoxyerythronolide B biosynthetic gene cluster from <i>Saccharopolyspora erythraea</i> , followed by removal of native secondary metabolite biosynthetic gene clusters and an operon for propionyl-CoA utilization, and feeding of propionate | 43% increase in yield, compared to the initial engineered strain                                 | 3    |
| A21978C (daptomycin)   | Antibiotic against Gram-positive bacterial pathogens | <i>Streptomyces roseosporus</i>                                                      | Reporter-guided <i>rpsL</i> mutation selection method and ribosome engineering using streptomycin                                                                                                                                                                                    | 2.2-fold increase in titer, compared to the parent strain                                        | 4    |
| Actinorhodin           | Antibiotic                                           | <i>Streptomyces coelicolor</i>                                                       | Genome-scale metabolic modeling and its use to identify overexpression targets                                                                                                                                                                                                       | 52-fold increase in titer, compared to the wild-type                                             | 5    |
| Actinorhodin           | Antibiotic                                           | <i>Streptomyces coelicolor</i>                                                       | Overexpression of the gene <i>abrC3</i> encoding a positive response regulator of antibiotic biosynthesis                                                                                                                                                                            | 33% increase in titer, compared to the wild-type                                                 | 6    |
| Actinorhodin           | Antibiotic                                           | <i>Streptomyces coelicolor</i>                                                       | Replacement of a promoter of the positive regulator <i>actII orf4</i> with synthetic promoters                                                                                                                                                                                       | Approximately 2.8 times increase in yield on biomass, compared to the wild-type                  | 7    |
| Actinorhodin           | Antibiotic                                           | <i>Streptomyces coelicolor</i>                                                       | Identification of gene overexpression targets using transcriptome-based metabolic simulation                                                                                                                                                                                         | Up to 2-fold increase in titer, compared to the wild-type                                        | 8    |
| Amphotericin B         | Antibiotic and antifungal                            | <i>Streptomyces nodosus</i>                                                          | Overexpression of a pathway-specific transcriptional activator (AmphRIV)                                                                                                                                                                                                             | 4-fold increase in yield on biomass, compared to the untransformed parent strain                 | 9    |
| Ansamitocin            | Anticancer                                           | <i>Actinosynnem pretiosum</i>                                                        | Increase of the precursor UDP-glucose pool by overexpressing phosphoglucomutase and UDP-                                                                                                                                                                                             | 40% greater titer, compared to the control strain                                                | 10   |

| Secondary metabolite | Application                                          | Production host                                    | Approach                                                                                                                                                                                                                                                 | Production improvement                                                                                                        | Refs |
|----------------------|------------------------------------------------------|----------------------------------------------------|----------------------------------------------------------------------------------------------------------------------------------------------------------------------------------------------------------------------------------------------------------|-------------------------------------------------------------------------------------------------------------------------------|------|
|                      |                                                      |                                                    | glucose pyrophosphorylase                                                                                                                                                                                                                                |                                                                                                                               |      |
| Avermectin           | Anthelmintic and insecticide                         | <i>Streptomyces avermitilis</i>                    | Overexpression of two genes targeted by the TetR family transcriptional regulator SAV151                                                                                                                                                                 | Approximately 2-3 folds increase in titer, compared to the wild-type                                                          | 11   |
| Botromycin           | Antibiotic                                           | <i>Streptomyces coelicolor</i> (heterologous host) | Heterologous expression of a gene cluster from <i>Streptomyces</i> sp. BC16019 and overexpression of an efflux pump                                                                                                                                      | 20-fold increase in titer, compared to the unoptimized transformant of <i>S. coelicolor</i>                                   | 12   |
| Bisabolene           | Fragrance and food additive                          | <i>Streptomyces venezuelae</i>                     | Heterologous expression of a codon optimized bisabolene synthase from <i>Abeis grandis</i> , removal of competing pathways and overexpression of genes encoding farnesyl pyrophosphate synthase                                                          | 350 times increase in titer, compared to the cumulative terpene titers from the wild-type                                     | 13   |
| Chlortetracycline    | Antibiotic                                           | <i>Streptomyces aureofaciens</i>                   | Overexpression of the gene <i>ctcP</i> encoding an FADH <sub>2</sub> -dependent halogenase responsible for the last step of chlortetracycline biosynthesis                                                                                               | 1.73-fold increase in titer, compared to the wild-type                                                                        | 14   |
| Daptomycin           | Antibiotic against Gram-positive bacterial pathogens | <i>Streptomyces roseosporus</i>                    | Ribosome engineering using a diterpenoid antibiotic pleuromutilin                                                                                                                                                                                        | 30% increase in titer, compared to the wild-type                                                                              | 15   |
| Daptomycin           | Antibiotic against Gram-positive bacterial pathogens | <i>Streptomyces roseosporus</i>                    | Overexpression of the <i>dptJ</i> gene encoding tryptophan-2,3-dioxygenase                                                                                                                                                                               | More than 2-fold increase in titer, compared to the wild-type                                                                 | 16   |
| Daptomycin           | Antibiotic against Gram-positive bacterial pathogens | <i>Streptomyces roseosporus</i>                    | Medium optimization using Plackett-Burman design and response surface methodology                                                                                                                                                                        | 2.2-fold increase in titer, compared to the unoptimized medium                                                                | 17   |
| Daptomycin           | Antibiotic against Gram-positive bacterial pathogens | <i>Streptomyces roseosporus</i>                    | Overexpression of DepR1, a TetR-family transcriptional regulator                                                                                                                                                                                         | 41% greater titer, compared to the wild-type, in 50 L bioreactor                                                              | 18   |
| Deoxyviolacein       | Antibacterial, antitumor and antiviral               | <i>Escherichia coli</i> (heterologous host)        | Division of deoxyviolacein biosynthetic pathway into two modules with L-tryptophan as a key intermediate, and sequential optimization of each module independently using a newly developed biosensor that detects the intracellular pool of L-tryptophan | 20% increase in titer, compared to the previously reported recombinant <i>E. coli</i> showing the best production performance | 19   |
| Divergolides         | Antibacterial and antitumor                          | <i>Streptomyces</i> sp. W112                       | Overexpression of a positive regulator of the divergolides biosynthetic pathway                                                                                                                                                                          | More than 2-fold increase in the titer, compared to the wild-type                                                             | 20   |

| Secondary metabolite | Application       | Production host                             | Approach                                                                                                                                                                  | Production improvement                                                                                                                                  | Refs |
|----------------------|-------------------|---------------------------------------------|---------------------------------------------------------------------------------------------------------------------------------------------------------------------------|---------------------------------------------------------------------------------------------------------------------------------------------------------|------|
| Doramectin           | Anthelmintic      | <i>Streptomyces avermitilis</i>             | Genome shuffling and ribosome engineering with streptomycin                                                                                                               | 11.2-fold increase in titer, compared to the parent strain NEAU1069, and production of 930.3 ± 3.8 mg L <sup>-1</sup> from 50 L bioreactor fermentation | 21   |
| Erythromycin         | Antibiotic        | <i>Saccharopolyspora erythraea</i>          | Genome-scale metabolic modeling and its use to identify supplementary amino acid to increase the production yield                                                         | 50% increase in yield on biomass, compared to the unoptimized media                                                                                     | 22   |
| Erythromycin         | Antibiotic        | <i>Escherichia coli</i> (heterologous host) | Enhancing intracellular supply of a precursor propionyl-CoA by removing <i>ygfH</i> gene in addition to heterologous expression of erythromycin biosynthetic gene cluster | 7-fold increase in titer, compared to the control strain                                                                                                | 23   |
| Erythromycin         | Antibiotic        | <i>Saccharopolyspora erythraea</i>          | Constitutive overexpression of SACE_5599, a positive regulatory protein of erythromycin biosynthesis newly identified using comparative proteome analysis                 | 32% increase in titer, compared to the wild-type                                                                                                        | 24   |
| Erythromycin         | Antibiotic        | <i>Escherichia coli</i> (heterologous host) | Reduction in the number of genes and expression plasmids to minimize metabolic burden and plasmid instability                                                             | 5-fold increase in titer, compared to the control strain                                                                                                | 25   |
| Erythromycin         | Antibiotic        | <i>Saccharopolyspora erythraea</i>          | Overexpression of SACE_7301, TetR family regulator                                                                                                                        | 27% greater titer, compared to the industrial strain (WB)                                                                                               | 26   |
| Erythromycin         | Antibiotic        | <i>Saccharopolyspora erythraea</i>          | Inactivation of a TetR family transcriptional regulator (SACE_3986) that negatively controls the biosynthesis of erythromycin                                             | 54.2% increase in titer, compared to the parent (industrial) strain                                                                                     | 27   |
| FK506                | Immunosuppressant | <i>Streptomyces tsukubaensis</i>            | Enhancing pathway-specific precursor supply via gene amplification and optimization of glucose supply                                                                     | 150% increase in titer, compared to the parent strain                                                                                                   | 28   |
| FK506                | Immunosuppressant | <i>Streptomyces tsukubaensis</i>            | Genome-scale metabolic modeling and its use to identify gene knockout and overexpression targets, followed by examination of the effects of combined gene manipulations   | 1.47-fold increase in titer, compared to the wild-type, from fed-batch fermentation                                                                     | 29   |
| FK506                | Immunosuppressant | <i>Streptomyces tsukubaensis</i>            | Overexpression of biosynthetic genes associated with FK506 production and external feeding of additional nutrients                                                        | 146% increase in titer after the combined gene overexpressions, compared to the wild-type, and                                                          | 30   |

| Secondary metabolite      | Application                       | Production host                     | Approach                                                                                                                                                                                                                                                | Production improvement                                                                                                                                                                                                                                                       | Refs |
|---------------------------|-----------------------------------|-------------------------------------|---------------------------------------------------------------------------------------------------------------------------------------------------------------------------------------------------------------------------------------------------------|------------------------------------------------------------------------------------------------------------------------------------------------------------------------------------------------------------------------------------------------------------------------------|------|
|                           |                                   |                                     |                                                                                                                                                                                                                                                         | additional 70% increase in titer after nutrient feeding                                                                                                                                                                                                                      |      |
| FK506                     | Immunosuppressant                 | <i>Streptomyces</i> sp. RM7011      | Random mutagenesis, followed by overexpression of propionyl-CoA carboxylase (PCC) pathway and external feeding of nutrients                                                                                                                             | 11.63-fold increase in titer (RM7011 strain), compared to the wild-type, through random mutagenesis, 1.75-fold increase in titer from overexpression of PCC pathway, compared to the RM7011 strain, and further increase in titer by providing vinyl propionate and Tween 80 | 31   |
| Gougerotin                | Antibiotic                        | <i>Streptomyces graminearus</i>     | Engineering of the biosynthetic gene cluster by removing a pathway-specific regulatory gene and replacing native promoters with constitutive promoters, integration of the engineered gene cluster into the host genome and external feeding of glycine | 2.5-fold increase in titer, compared to the wild-type                                                                                                                                                                                                                        | 32   |
| Jadomycin B               | Antibiotic                        | <i>Streptomyces venezuelae</i>      | Use of heterologous constitutive promoters locating upstream of jadomycin B biosynthetic gene cluster                                                                                                                                                   | 2-fold increase in titer, compared to the strain with a widely used constitutive promoter <i>ermE</i> *p                                                                                                                                                                     | 33   |
| Milbemycins A3/A4         | Pesticide and veterinary medicine | <i>Streptomyces bingchenggensis</i> | Removal of other byproducts via gene knockouts                                                                                                                                                                                                          | 74% increase in titer, compared to the milbemycins-overproducing control strain of <i>S. bingchenggensis</i>                                                                                                                                                                 | 34   |
| Mithramycin               | Antitumor                         | <i>Streptomyces argillaceus</i>     | Enhancing intracellular supply of two precursors malonyl-CoA and glucose-1-phosphate by preventing their conversions to other metabolites via gene knockouts, and upregulation of their biosynthetic reactions                                          | 3.3 and 4.7 times increases in titer, compared to the wild-type strain, in liquid and solid media, respectively                                                                                                                                                              | 35   |
| Nargenicin A <sub>1</sub> | Antibiotic                        | <i>Nocardia</i> sp. CS682           | Optimization of transformation condition and overexpression of heterologous genes encoding positive regulator of secondary metabolite biosynthesis ( <i>S</i> -adenosylmethionine synthetase) or acetyl-CoA carboxylase                                 | 2.8- and 3.8-fold increases in titer for overexpression of <i>S</i> -adenosylmethionine synthetase and acetyl-CoA carboxylase, respectively, compared to the wild-type                                                                                                       | 36   |

| Secondary metabolite                       | Application                                     | Production host                               | Approach                                                                                                                                                                                                 | Production improvement                                                                                                        | Refs |
|--------------------------------------------|-------------------------------------------------|-----------------------------------------------|----------------------------------------------------------------------------------------------------------------------------------------------------------------------------------------------------------|-------------------------------------------------------------------------------------------------------------------------------|------|
|                                            |                                                 |                                               | in order to enhance precursor supply                                                                                                                                                                     |                                                                                                                               |      |
| Natamycin                                  | Antifungal                                      | <i>Streptomyces chattanoogensis</i>           | Overexpression of one of genes encoding phosphopantetheinyl transferases (SchPPT)                                                                                                                        | 40% increase in titer and 24 h faster production, compared to the industrial natamycin producer <i>S. chattanoogensis</i> L10 | 37   |
| Neomycin                                   | Antibiotic                                      | <i>Streptomyces fradiae</i>                   | Medium optimization using Plackett-Burman design and response surface methodology                                                                                                                        | 2.7-fold increase in yield from dry coconut oil cake, compared to the unoptimized medium                                      | 38   |
| Nosiheptide                                | Antibiotic                                      | <i>Streptomyces actuosus</i>                  | Medium optimization using Plackett-Burman design and response surface methodology                                                                                                                        | 1.56-fold increase in titer, compared to the unoptimized medium                                                               | 39   |
| Phenazine-1-carboxylic acid (Shenqinmycin) | Antibiotic and biopesticide                     | <i>Pseudomonas aeruginosa</i>                 | Enhancing fluxes towards phenazine-1-carboxylic acid (PCA) biosynthesis by removing or downregulating competing reactions, and amplifying reactions that increase biosynthesis of PCA and its precursors | 53.6-fold increase in titer, compared to the wild-type                                                                        | 40   |
| Pikromycin                                 | Antibiotic                                      | <i>Streptomyces venezuelae</i>                | Medium optimization using Plackett-Burman design, method of steepest ascent and response surface methodology                                                                                             | 1.5- to 2-fold increase in titer, compared to the unoptimized media                                                           | 41   |
| Pretubulysin A                             | Structural core of an anticancer tubulysin      | <i>Myxococcus xanthus</i> (heterologous host) | Heterologous expression of a gene cluster from <i>Cystobacter</i> sp. SBCb004 and supplementation of L-pipecolic acid                                                                                    | 100-fold increase in titer (0.19 mg L <sup>-1</sup> ), compared to another heterologous host <i>Pseudomonas putida</i>        | 42   |
| Pristinamycin II                           | A component of pristinamycin that is antibiotic | <i>Streptomyces pristinaespiralis</i>         | Overexpression of the pristinamycin II biosynthetic gene cluster, knockout of a repressor gene, overexpression of two activator genes, and addition of macroreticular resin                              | 5.26-fold increase in titer, compared to the parental strain, from 5 L bioreactor                                             | 43   |
| Spinosad                                   | Antibiotic and pesticide                        | <i>Saccharopolyspora spinosa</i>              | Overexpression of genes associated with biosynthesis of precursors                                                                                                                                       | 5-fold increase in titer, compared to the wild-type                                                                           | 44   |
| Spinosad                                   | Antibiotic and pesticide                        | <i>Saccharopolyspora spinosa</i>              | Genome-scale metabolic modeling and its use to examine the effects of supplementary amino acids and transhydrogenase activity on the production yield                                                    | 86.5% increase in titer, compared to the wild-type                                                                            | 45   |
| Spinosad (spinosyns)                       | Antibiotic and pesticide                        | <i>Saccharopolyspora</i>                      | UV mutagenesis, followed by                                                                                                                                                                              | 7 to 8-fold increase in titer,                                                                                                | 46   |

| Secondary metabolite                                 | Application                               | Production host                                    | Approach                                                                                                                                                                                                                                                                                                                                                 | Production improvement                                                                                                                                              | Refs |
|------------------------------------------------------|-------------------------------------------|----------------------------------------------------|----------------------------------------------------------------------------------------------------------------------------------------------------------------------------------------------------------------------------------------------------------------------------------------------------------------------------------------------------------|---------------------------------------------------------------------------------------------------------------------------------------------------------------------|------|
| A and D)                                             |                                           | <i>spinosa</i>                                     | heterologous expression of genes from <i>Streptomyces peuceitius</i> , all involved in spinosad biosynthesis                                                                                                                                                                                                                                             | compared the wild-type                                                                                                                                              |      |
| Surfactin                                            | Biosurfactant and plant disease control   | <i>Bacillus amyloliquefaciens</i>                  | Genome shuffling                                                                                                                                                                                                                                                                                                                                         | 10.3-fold increase in titer, compared to the wild-type                                                                                                              | 47   |
| Teicoplanin                                          | Antibiotic                                | <i>Actinoplanes teichomyceticus</i>                | Selection of the <i>hrdB</i> gene encoding principal sigma factor from <i>Actinoplanes missouriensis</i> 431, <i>Micromonospora aurantiaca</i> ATCC 27029 and <i>Salinispora arenicola</i> CNS-205 according to molecular evolutionary analysis, and their expression in <i>A. teichomyceticus</i> L-27 after their random mutagenesis and DNA shuffling | 2-fold increase in titer, compared to the industrial producer strain <i>A. teichomyceticus</i> L-27                                                                 | 48   |
| Teicoplanin                                          | Antibiotic                                | <i>Actinoplanes teichomyceticus</i>                | Overexpression of a pathway-specific regulatory gene <i>tei15*</i>                                                                                                                                                                                                                                                                                       | 3.5-fold increase in titer, compared to the wild-type, from 3 L bioreactor                                                                                          | 49   |
| Thailanstatin A                                      | Anticancer and an analog of spliceostatin | <i>Burkholderia sp.</i> FERM BP-3421               | Fermentation media optimization, removal of a reaction converting the target compound into another metabolite, and overexpression of the target compound biosynthetic reaction                                                                                                                                                                           | More than 40-fold increase in titer (2.5 g L <sup>-1</sup> ), compared to the wild-type                                                                             | 50   |
| Toyocamycin, tetramycin P, tetrin B and tetramycin A | Antifungal                                | <i>Streptomyces diastatochromogenes</i>            | Ribosome engineering using erythromycin, gentamicin, paromomycin, rifampin and streptomycin                                                                                                                                                                                                                                                              | 4.1-, 7.8-, 5.1- and 13-fold increases in titer of toyocamycin, tetramycin P, tetrin B and tetramycin A, respectively, using paromomycin, compared to the wild-type | 51   |
| Tylactone                                            | A precursor of an antibiotic tylosin      | <i>Streptomyces venezuelae</i> (heterologous host) | Enhancing a polyketide precursor ethylmalonyl-CoA by preventing its conversion to other metabolites via a gene knockout, ethylmalonate supplementation in the medium and upregulation of the tylosin biosynthetic pathway                                                                                                                                | Near 10-fold increase in titer, compared to the parent strain                                                                                                       | 52   |
| Validamycin A                                        | Antibiotic and antifungal                 | <i>Streptomyces hygroscopicus</i>                  | Overexpression of the validamycin biosynthetic gene cluster                                                                                                                                                                                                                                                                                              | 34% increase in titer, compared to the wild-type                                                                                                                    | 53   |

| Secondary metabolite                    | Application                             | Production host                             | Approach                                                                                                                                                                                                             | Production improvement                                                                                                                    | Refs |
|-----------------------------------------|-----------------------------------------|---------------------------------------------|----------------------------------------------------------------------------------------------------------------------------------------------------------------------------------------------------------------------|-------------------------------------------------------------------------------------------------------------------------------------------|------|
| Validamycin                             | Antibiotic and antifungal               | <i>Streptomyces hygroscopicus</i>           | Dual knockouts of two $\gamma$ -butyrolactone receptor genes <i>shbR1</i> and <i>shbR3</i>                                                                                                                           | 55% increase in titer, compared to the wild-type                                                                                          | 54   |
| Valinomycin                             | Antibiotic                              | <i>Escherichia coli</i> (heterologous host) | Heterologous expression of valinomycin biosynthetic genes from <i>Streptomyces tsusimaensis</i> , followed by production optimization through high cell density cultivation and coexpression of type II thioesterase | 13 mg L <sup>-1</sup> , a 43-fold increase in titer, compared to the recombinant <i>E. coli</i> strain before the production optimization | 55   |
| Valinomycin                             | Antibiotic                              | <i>Escherichia coli</i> (heterologous host) | Optimization of fed-batch cultivation                                                                                                                                                                                | 33-fold increase in titer without external feeding of specific precursors, compared to the batch cultivation                              | 56   |
| WAP-8294A and HSAF (dihydromaltophilin) | WAP-8294A, antibiotic; HSAF, antifungal | <i>Lysobacter enzymogenes</i>               | Site-specific integration of ORF8 gene that positively regulates the production of these two compounds                                                                                                               | 2-fold increase in titer for WAP-8294A and 7-fold increase in titer for HSAF, both compared to the wild-type                              | 57   |



## References

§ References in press are indicated with DOI.

1. A. Lechner, M. C. Wilson, Y. H. Ban, J. Y. Hwang, Y. J. Yoon and B. S. Moore, *ACS Synth. Biol.*, 2013, **2**, 379-383.
2. H. Y. Wang, J. Zhang, Y. J. Zhang, B. Zhang, C. X. Liu, H. R. He, X. J. Wang and W. S. Xiang, *Appl. Microbiol. Biotechnol.*, 2014, **98**, 9703-9712.
3. J. Kumpfmuller, K. Methling, L. Fang, B. A. Pfeifer, M. Lalk and T. Schweder, *Appl. Microbiol. Biotechnol.*, 2016, **100**, 1209-1220.
4. L. Wang, Y. Zhao, Q. Liu, Y. Huang, C. Hu and G. Liao, *J. Appl. Microbiol.*, 2012, **112**, 1095-1101.
5. M. Kim, J. Sang Yi, J. Kim, J. N. Kim, M. W. Kim and B. G. Kim, *Biotechnol. J.*, 2014, **9**, 1185-1194.
6. S. Rico, R. I. Santamaria, A. Yepes, H. Rodriguez, E. Laing, G. Bucca, C. P. Smith and M. Diaz, *Appl. Environ. Microbiol.*, 2014, **80**, 2417-2428.
7. S. V. Sohoni, A. Fazio, C. T. Workman, I. Mijakovic and A. E. Lantz, *PLoS One*, 2014, **9**, e99701.
8. M. Kim, J. S. Yi, M. Lakshmanan, D. Y. Lee and B. G. Kim, *Biotechnol. Bioeng.*, 2016, **113**, 651-660.
9. P. Sweeney, C. D. Murphy and P. Caffrey, *Appl. Microbiol. Biotechnol.*, 2016, **100**, 1285-1295.
10. Y. Fan, M. Zhao, L. Wei, F. Hu, T. Imanaka, L. Bai and Q. Hua, *Appl. Microbiol. Biotechnol.*, 2016, **100**, 2651-2662.
11. F. He, W. Liu, D. Sun, S. Luo, Z. Chen, Y. Wen and J. Li, *Appl. Microbiol. Biotechnol.*, 2014, **98**, 399-409.
12. L. Huo, S. Rachid, M. Stadler, S. C. Wenzel and R. Muller, *Chem. Biol.*, 2012, **19**, 1278-1287.
13. R. M. Phelan, O. N. Sekurova, J. D. Keasling and S. B. Zotchev, *ACS Synth. Biol.*, 2015, **4**, 393-399.
14. T. Zhu, X. Cheng, Y. Liu, Z. Deng and D. You, *Metab. Eng.*, 2013, **19**, 69-78.
15. L. Li, T. Ma, Q. Liu, Y. Huang, C. Hu and G. Liao, *Biomed Res. Int.*, 2013, **2013**, 479742.
16. G. Liao, L. Wang, Q. Liu, F. Guan, Y. Huang and C. Hu, *Biotechnol. Prog.*, 2013, **29**, 847-852.
17. G. Yu and G. Wang, *Interdiscip. Sci.*, 2015, DOI: 10.1007/s12539-015-0133-8.
18. P. H. Yuan, R. C. Zhou, X. Chen, S. Luo, F. Wang, X. M. Mao and Y. Q. Li, *Appl. Environ. Microbiol.*, 2016, **82**, 1898-1905.
19. M. Fang, T. Wang, C. Zhang, J. Bai, X. Zheng, X. Zhao, C. Lou and X. H. Xing, *Metab. Eng.*, 2016, **33**, 41-51.
20. S. R. Li, G. S. Zhao, M. W. Sun, H. G. He, H. X. Wang, Y. Y. Li, C. H. Lu and Y. M. Shen, *Gene*, 2014, **544**, 93-99.
21. J. Zhang, X. Wang, J. Diao, H. He, Y. Zhang and W. Xiang, *J. Ind. Microbiol. Biotechnol.*, 2013, **40**, 877-889.
22. C. Licona-Cassani, E. Marcellin, L. E. Quek, S. Jacob and L. K. Nielsen, *Antonie Van Leeuwenhoek*, 2012, **102**, 493-502.
23. H. Zhang, K. Skalina, M. Jiang and B. A. Pfeifer, *Biotechnol. Prog.*, 2012, **28**, 292-296.

24. B. Kirm, V. Magdevska, M. Tome, M. Horvat, K. Karnicar, M. Petek, R. Vidmar, S. Baebler, P. Jamnik, S. Fujs, J. Horvat, M. Fonovic, B. Turk, K. Gruden, H. Petkovic and G. Kosec, *Microb. Cell Fact.*, 2013, **12**, 126.
25. M. Jiang, L. Fang and B. A. Pfeifer, *Biotechnol. Prog.*, 2013, **29**, 862-869.
26. H. Wu, M. Chen, Y. Mao, W. Li, J. Liu, X. Huang, Y. Zhou, B. C. Ye, L. Zhang, D. T. Weaver and B. Zhang, *Microb. Cell Fact.*, 2014, **13**, 158.
27. P. Wu, H. Pan, C. Zhang, H. Wu, L. Yuan, X. Huang, Y. Zhou, B. C. Ye, D. T. Weaver, L. Zhang and B. Zhang, *J. Ind. Microbiol. Biotechnol.*, 2014, **41**, 1159-1167.
28. D. Chen, Q. Zhang, Q. Zhang, P. Cen, Z. Xu and W. Liu, *Appl. Environ. Microbiol.*, 2012, **78**, 5093-5103.
29. D. Huang, S. Li, M. Xia, J. Wen and X. Jia, *Microb. Cell Fact.*, 2013, **12**, 52.
30. D. Huang, M. Xia, S. Li, J. Wen and X. Jia, *J. Ind. Microbiol. Biotechnol.*, 2013, **40**, 1023-1037.
31. S. Mo, S. K. Lee, Y. Y. Jin, C. H. Oh and J. W. Suh, *Appl. Microbiol. Biotechnol.*, 2013, **97**, 3053-3062.
32. L. Jiang, J. Wei, L. Li, G. Niu and H. Tan, *Appl. Microbiol. Biotechnol.*, 2013, **97**, 10469-10477.
33. S. Li, J. Wang, X. Li, S. Yin, W. Wang and K. Yang, *Microb. Cell Fact.*, 2015, **14**, 172.
34. J. Zhang, J. An, J. J. Wang, Y. J. Yan, H. R. He, X. J. Wang and W. S. Xiang, *Appl. Microbiol. Biotechnol.*, 2013, **97**, 10091-10101.
35. D. Zabala, A. F. Brana, A. B. Florez, J. A. Salas and C. Mendez, *Metab. Eng.*, 2013, **20**, 187-197.
36. S. Maharjan, D. Koju, H. C. Lee, J. C. Yoo and J. K. Sohng, *Appl. Biochem. Biotechnol.*, 2012, **166**, 805-817.
37. H. Jiang, Y. Y. Wang, X. X. Ran, W. M. Fan, X. H. Jiang, W. J. Guan and Y. Q. Li, *Appl. Environ. Microbiol.*, 2013, **79**, 3346-3354.
38. B. M. Vastrad and S. E. Neelagund, *Biotechnol. Res. Int.*, 2014, **2014**, 674286.
39. W. Zhou, X. Liu, P. Zhang, P. Zhou and X. Shi, *Molecules*, 2014, **19**, 15507-15520.
40. K. Jin, L. Zhou, H. Jiang, S. Sun, Y. Fang, J. Liu, X. Zhang and Y. W. He, *Metab. Eng.*, 2015, **32**, 30-38.
41. J. S. Yi, M. S. Kim, S. J. Kim and B. G. Kim, *J. Microbiol. Biotechnol.*, 2015, **25**, 496-502.
42. Y. Chai, S. Shan, K. J. Weissman, S. Hu, Y. Zhang and R. Muller, *Chem. Biol.*, 2012, **19**, 361-371.
43. L. Li, Y. Zhao, L. Ruan, S. Yang, M. Ge, W. Jiang and Y. Lu, *Metab. Eng.*, 2015, **29**, 12-25.
44. C. Xue, Y. Duan, F. Zhao and W. Lu, *Biochem. Eng. J.*, 2013, **72**, 90-95.
45. X. Wang, C. Zhang, M. Wang and W. Lu, *Microb. Cell Fact.*, 2014, **13**, 41.
46. A. K. Jha, A. R. Pokhrel, A. K. Chaudhary, S. W. Park, W. J. Cho and J. K. Sohng, *Mol. Cells*, 2014, **37**, 727-733.
47. J. Zhao, Y. Li, C. Zhang, Z. Yao, L. Zhang, X. Bie, F. Lu and Z. Lu, *J. Ind. Microbiol. Biotechnol.*, 2012, **39**, 889-896.
48. H. Wang, L. Yang, K. Wu and G. Li, *Microb. Cell Fact.*, 2014, **13**, 10.
49. L. Horbal, A. Kobylansky, A. W. Truman, N. Zaburranyi, B. Ostash, A. Luzhetskyy, F. Marinelli and V. Fedorenko, *Appl. Microbiol. Biotechnol.*, 2014, **98**, 9295-9309.
50. A. S. Eustaquio, L. P. Chang, G. L. Steele, C. J. O'Donnell and F. E. Koehn, *Metab. Eng.*, 2016, **33**, 67-75.
51. X. Shentu, N. Liu, G. Tang, Y. Tanaka, K. Ochi, J. Xu and X. Yu, *J. Antibiot. (Tokyo)*, 2015, DOI: 10.1038/ja.2015.123.

52. W. S. Jung, E. Kim, Y. J. Yoo, Y. H. Ban, E. J. Kim and Y. J. Yoon, *Appl. Microbiol. Biotechnol.*, 2014, **98**, 3701-3713.
53. T. C. Zhou, B. G. Kim and J. J. Zhong, *Appl. Microbiol. Biotechnol.*, 2014, **98**, 7911-7922.
54. G. Y. Tan, Y. Peng, C. Lu, L. Bai and J. J. Zhong, *Metab. Eng.*, 2015, **28**, 74-81.
55. J. Jaitzig, J. Li, R. D. Sussmuth and P. Neubauer, *ACS Synth. Biol.*, 2014, **3**, 432-438.
56. J. Li, J. Jaitzig, F. Hillig, R. Sussmuth and P. Neubauer, *Appl. Microbiol. Biotechnol.*, 2014, **98**, 591-601.
57. Y. Wang, G. Qian, F. Liu, Y. Z. Li, Y. Shen and L. Du, *ACS Synth. Biol.*, 2013, **2**, 670-678.
